# Supplementary material for: Species and Strain Glycosylation Patterns of PrPSc
Source: PLoS One. 2009 May 20;4(5):e5633. doi: 10.1371/journal.pone.0005633 (PMC2680983; doi:10.1371/journal.pone.0005633)
Supplement: Table S1 — Lectins used in the study. All the lectins were diluted to 10 µg/ml, except for DSL (6 µg/ml) and checked for PrPSc recognition on SAFs or guanidinium preparations, as outlined in ‘Materials and Methods’. (-) indicates lack of PrPSc recognition, as assessed by the apparent molecular masses of the bands. Abbreviations used: mBSE: murine BSE; Sc: ovine scrapie; sCJD: human sporadic CJD; vCJD: human variant CJD; BSE: bovine BSE; mSc: murine scrapie; oBSE: ovine BSE; Nor98: atypical Nor98 ovine scrapie. (0.05 MB DOC) [file pone.0005633.s006.doc]

| Lectin | Specificity | Tested on | PrPSc Reactivity |
| --- | --- | --- | --- |
| Concanavalin A | α-linked mannose | mBSE, Sc, sCJD, BSE SAFs | - |
| Datura stramonium agglutinin | β→1,4 linked N-acetylglucosamine oligomers | mBSE, Sc, sCJD, vCJD, BSE SAFs | di- and mono- glycosylated PrPSc (mostly the di- in BSE and vCJD) |
|  |  | mBSE, mSc, Sc, sCJD, BSE, oBSE and Nor98 guanidinium preps | di- and mono- glycosylated PrPSc in mBSE, mSc, Sc, sCJD, BSE, oBSE samples; multi-band pattern in Nor98 guanidinium preps |
| Erythrina cristagalli lectin | galactosyl (β→1,4) N-acetylglucosamine | Nor98 guanidinium preps | - |
| Griffonia simplicifolia lectin I | α-N-acetylgalactosamine residues and α-galactose residues | Nor98 guanidinium preps | - |
| Jacalin | o-linked oligosaccharides; preference for galactosyl (β→1,3) N-acetylgalactosamine | mBSE, Sc, sCJD, BSE SAFs | - |
| Lens culinaris agglutinin | α-linked mannose residues | mBSE, Sc, sCJD, BSE SAFs | weak recognition of the di- and mono- glycosylated bands |
|  |  | Nor98 guanidinium preps | - |
| Lycopersicum esculentum lectin | N-acetylglucosamine oligomers; preference for trimers and tetramers | mBSE, Sc, sCJD, BSE SAFs | - |
|  |  | Nor98 guanidinium preps | - |
| Maackia amurensis lectin II | sialic acid in α→2,3 linkage | mBSE, Sc, sCJD, BSE SAFs | - |
|  |  | Nor98 guanidinium preps | - |
| Pisum sativum agglutinin | α-linked mannose-containing oligosaccharides; preference for those with an N-acetylchitobiose-linked α-fucose residue included in the receptor sequence | Nor98 guanidinium preps | - |
| Ricinus communis agglutinin I | oligosaccharides ending in galactose and N-acetyl-galactosamine; may also interact with N-acetylgalactosamine | mBSE, Sc, sCJD, vCJD, BSE SAFs | di- and mono- glycosylated PrPSc (mostly the di- in BSE and vCJD) |
|  |  | mBSE, mSc, Sc, sCJD, BSE, oBSE and Nor98 guanidinium preps | di- and mono- glycosylated PrPSc in mBSE, mSc, Sc, sCJD, BSE, oBSE samples; multi-band pattern in Nor98 guanidinium preps |
| Sambucus nigra agglutinin | sialic acid attached to terminal galactose in α→2,6, and to a lesser degree α→2,3, linkage | mBSE, Sc, sCJD, BSE SAFs | di- and mono- glycosylated PrPSc, but other interfering bands with similar molecular weights were also recognized |
| Solanum tuberosum lectin | oligomers of N-acetylglucosamine | mBSE, Sc, sCJD, BSE SAFs | - |
|  |  | Nor98 guanidinium preps | - |
| Ulex europaeus agglutinin I | glycoproteins and glycolipids containing α-linked fucose residues | mBSE, Sc, sCJD, BSE SAFs | - |
| Vicia villosa lectin | α- or β-linked terminal N-acetylgalactosamine; preference for the Tn antigen | Nor98 guanidinium preps | - |
| Wheat germ agglutinin | N-acetylglucosamine; preference for dimers and trimers | mBSE, Sc, sCJD, BSE SAFs | faint staining of the diglycosylated PrPSc band |

**Table S1: Lectins used in the study.** All the lectins were diluted to 10 μg/ml, except for DSL (6 μg/ml), and checked for PrPSc recognition on SAFs or guanidinium preparations, as outlined in 'Materials and Methods'. (–) indicates lack of PrPSc recognition, as assessed by the apparent molecular masses of the bands. Abbreviations used: mBSE: murine BSE; Sc: ovine scrapie; sCJD: human sporadic CJD; vCJD: human variant CJD; BSE: bovine BSE; mSc: murine scrapie; oBSE: ovine BSE; Nor98: atypical Nor98 ovine scrapie.
